# Supplementary material for: Impact of agitation/activation strategies on the antibiofilm potential of sodium hypochlorite/etidronate mixture in vitro
Source: Springer Nature journal article supplement (doi:10.1186/s12903-022-02222-1), 2022-05-23
Supplement: MOESM1 [file 22766994]

Supplementary material. Bacterial counts of *E. faecalis* (a) and *S.gordonni* (b) before preparation (S1), after preparation (S2) and after final irrigation (S3).

(a)

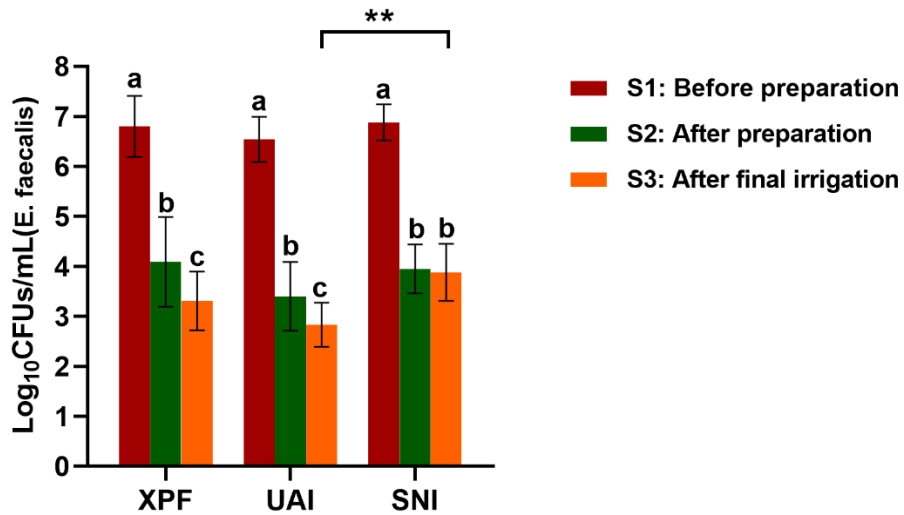

(b)

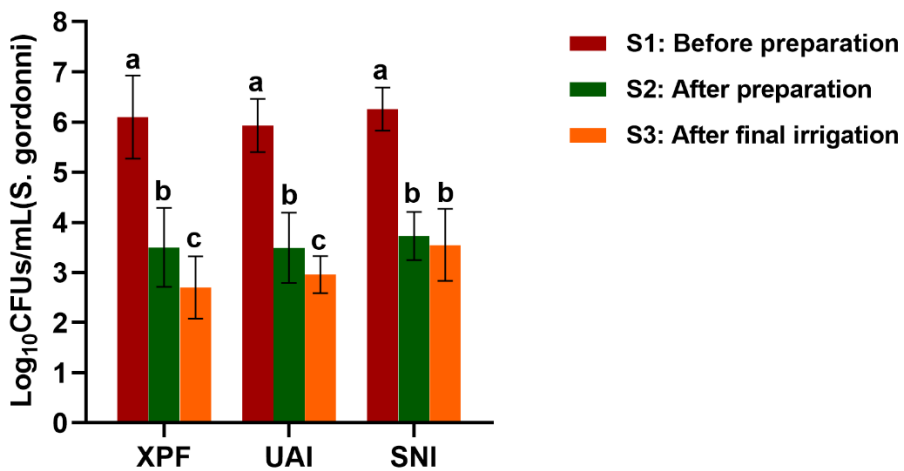

Different lower-case letters indicate significant differences within each group (P < 0.05).

Asterisks indicate significant differences of S3 among groups (\*\*P < 0.01).
